# Supplementary material
Source: MDPI journal article supplement (https://www.mdpi.com/2073-445X/12/9/1661)
Supplement: s1 [file s1]

**Table 1. Maximum distance and weight of the threats affecting habitat quality (Habitat Maintenance)**

| Threat                     | Maximum Distance | Weight | Decay       |
|----------------------------|------------------|--------|-------------|
| Paddy field                | 5                | 0.6    | linear      |
| Dry land                   | 5                | 0.6    | linear      |
| Urban land                 | 10               | 1      | exponential |
| Rural settlement           | 6                | 0.8    | exponential |
| Industrial and mining land | 8                | 1      | exponential |
| Railway                    | 5                | 0.6    | exponential |
| Primary road               | 3                | 0.8    | linear      |

**Table 2. The sensitivity of habitat types to each threat factor (Habitat Maintenance)**

| Land-use type              | Habitat           | Sensitivity to threats |          |            |                  |                            |         |              |
|----------------------------|-------------------|------------------------|----------|------------|------------------|----------------------------|---------|--------------|
|                            | suitability score | Paddy field            | Dry land | Urban land | Rural settlement | Industrial and mining land | Railway | Primary road |
| Paddy field                | 0.4               | 0.4                    | 0.3      | 0.8        | 0.7              | 0.7                        | 0.35    | 0.3          |
| Dry land                   | 0.3               | 0.4                    | 0.4      | 0.7        | 0.6              | 0.6                        | 0.35    | 0.3          |
| Forest                     | 1                 | 0.6                    | 0.6      | 0.8        | 0.7              | 0.9                        | 0.6     | 0.55         |
| Shrubland                  | 0.9               | 0.55                   | 0.55     | 0.75       | 0.65             | 0.85                       | 0.55    | 0.5          |
| Sparse woods               | 0.7               | 0.5                    | 0.5      | 0.7        | 0.6              | 0.8                        | 0.5     | 0.45         |
| Others woods               | 0.6               | 0.5                    | 0.5      | 0.7        | 0.6              | 0.8                        | 0.5     | 0.4          |
| Dense grassland            | 0.8               | 0.5                    | 0.5      | 0.75       | 0.65             | 0.8                        | 0.45    | 0.4          |
| Moderate grassland         | 0.7               | 0.4                    | 0.4      | 0.7        | 0.6              | 0.75                       | 0.4     | 0.35         |
| Sparse grassland           | 0.6               | 0.3                    | 0.3      | 0.65       | 0.6              | 0.7                        | 0.35    | 0.3          |
| River and canal            | 0.9               | 0.8                    | 0.7      | 0.85       | 0.8              | 0.8                        | 0.5     | 0.5          |
| Reservoir and pond         | 0.8               | 0.3                    | 0.3      | 0.8        | 0.7              | 0.5                        | 0.5     | 0.5          |
| Tidal flat                 | 0.9               | 0.6                    | 0.6      | 0.7        | 0.65             | 0.7                        | 0.65    | 0.6          |
| Urban land                 | 0                 | 0                      | 0        | 0          | 0                | 0                          | 0       | 0            |
| Rural settlement           | 0                 | 0                      | 0        | 0          | 0                | 0                          | 0       | 0            |
| Industrial and mining land | 0                 | 0                      | 0        | 0          | 0                | 0                          | 0       | 0            |
| Swamp                      | 0.9               | 0.7                    | 0.6      | 0.8        | 0.7              | 0.3                        | 0.75    | 0.7          |

**Table 3. Carbon pool table (Carbon Sequestration)**

| Land use type     | $C_{above}$ | $C_{below}$ | $C_{soil}$ | $C_{dead}$ |
|-------------------|-------------|-------------|------------|------------|
| Cropland          | 4.53        | 0.906       | 71.02      | 0.56       |
| Woodland          | 19.44       | 3.888       | 69.85      | 1.94       |
| Grassland         | 2.74        | 0.548       | 43         | 0.21       |
| Waters            | 3.99        | 0.798       | 32.48      | 0.06       |
| Construction Land | 0.1         | 0.02        | 60         | 0.01       |
| Unused land       | 0.1         | 0.02        | 53.3       | 0.01       |

**Table 4. Biophysical Table (Water Yield)**

| Land-use type              | <i>root depth</i> | $K_c$ | $LULC_{veg}$ |
|----------------------------|-------------------|-------|--------------|
| Paddy field                | 700               | 0.8   | 1            |
| Dry land                   | 100               | 0.2   | 1            |
| Forest                     | 7000              | 1     | 1            |
| Shrubland                  | 5000              | 0.398 | 1            |
| Sparse woods               | 5000              | 1     | 1            |
| Others woods               | 2500              | 1     | 1            |
| Dense grassland            | 2500              | 0.65  | 1            |
| Moderate grassland         | 2000              | 0.65  | 1            |
| Sparse grassland           | 2000              | 0.65  | 1            |
| River and canal            | 10                | 1     | 0            |
| Reservoir and pond         | 10                | 1     | 0            |
| Tidal flat                 | 10                | 1     | 0            |
| Urban land                 | 0                 | 0.2   | 0            |
| Rural settlement           | 0                 | 0.2   | 0            |
| Industrial and mining land | 0                 | 0.2   | 0            |
| Swamp                      | 10                | 0.6   | 0            |
